# Supplementary material
Source: PubMed Central journal article supplement (PMC4035976)
Supplement: 1321109111_pnas.201321109SI.pdf [file 1321109111_pnas.201321109SI.pdf]

# Supporting Information

Hayashi-Takagi et al. 10.1073/pnas.1321109111

## SI Materials and Methods

Whole-cell recordings were made from cortical cultures. Small fire-polished patch electrodes (7–9 M $\Omega$ ) were used to prevent washing out cellular components required for long-term potentiation (LTP) induction. The series resistance in these recordings varied between 30 and 35 M $\Omega$ , and datasets where series resistance varied more than 10% during the recording were rejected for further analysis. No electronic compensations for series resistance were used. The patch electrode solution contained the following (mM): CsMeSO<sub>4</sub>, 115; EGTA, 0.4; TEA-Cl, 5; NaCl, 2.8; Hepes, 20; Mg-ATP, 3; Na-GTP, 0.5; Na-Phosphocreatine, 10 (pH 7.2); and osmolarity between 290 and 292 mosmol<sup>-1</sup>. The extracellular solution (ECS) composition contained the following (mM): NaCl, 143; KCl, 5; Hepes, 10; Glucose, 10; CaCl<sub>2</sub>, 2; tetrodotoxin, 0.0005; strychnine, 0.001; picrotoxin, 0.1 (pH 7.4); and osmolarity between 302 and 305 mosmol<sup>-1</sup>. During the basal recording of miniature excitatory

postsynaptic currents and uncaging-evoked excitatory postsynaptic currents (uEPSC), cells were voltage-clamped at –65 mV and perfused with ECS containing 200 mM amino-5-phosphonovaleric acid (APV) (APV-ECS). For chemical LTP induction, cells were maintained at 0 mV and perfused with ECS containing 30  $\mu$ M *D*-Serine for 10 min. For measuring uEPSC, cells were perfused with APV-ECS supplemented with 5 mM MNI-glutamate (Tocris Bioscience). Two-photon uncaging laser (720 nm: mode-locked Ti-Sapphire laser) was delivered to the spine head to photolyse the caged-glutamate for 2 ms. Intensity of uncaging laser was 20 mW at the back aperture of the objective lens. Duration and intensity of uncaging laser were controlled by electro-optic light modulator, Pockels cells (Conoptics Inc.). All electrophysiological data were acquired by multiclump 700B amplifier (Axon Instruments), and signals were digitized at 10 kHz and low pass-filtered at 2 kHz.





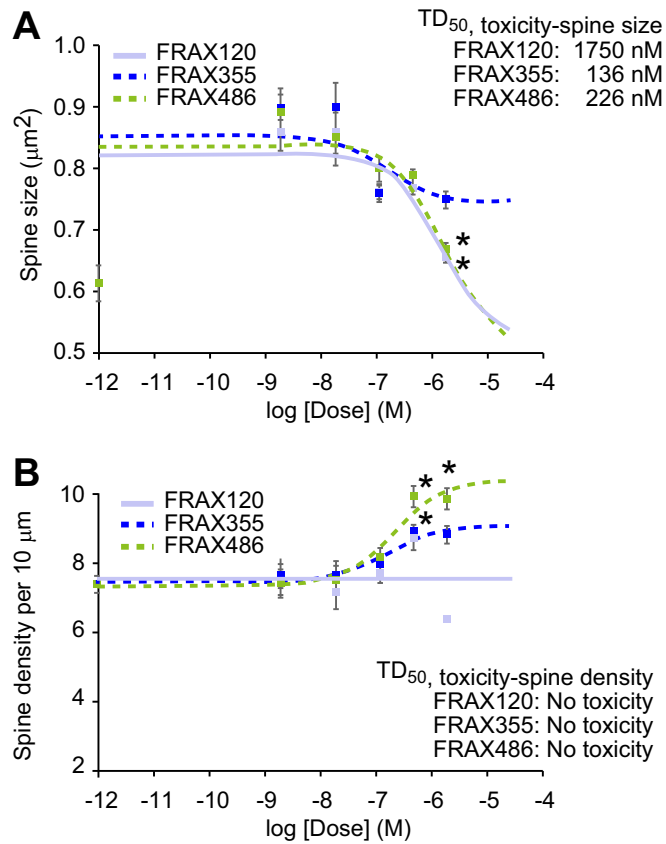

**Fig. 53.** Potential toxicity of PAK inhibitors on spine morphology under control conditions is shown (prophylactic paradigm). PAK inhibitors or vehicle were added at the time of transfection for control RNAi and incubated for 6 d before morphological analysis for the spine area size (A) and spine density (B). Asterisks indicate the significant difference between the spines with vehicle control and those with PAK inhibitors at each dose. Some adverse effects were observed only at doses more than a hundred times higher than the effective doses for synaptic protection against DISC1 RNAi (Fig. 3), suggesting that these PAK inhibitors had minimal effects on healthy spines. \* $P < 0.05$ . Dotted line indicates the average of the spine characteristics in neurons with control RNAi. Veh, only vehicle;  $TD_{50}$ , median toxic dose of 50%.





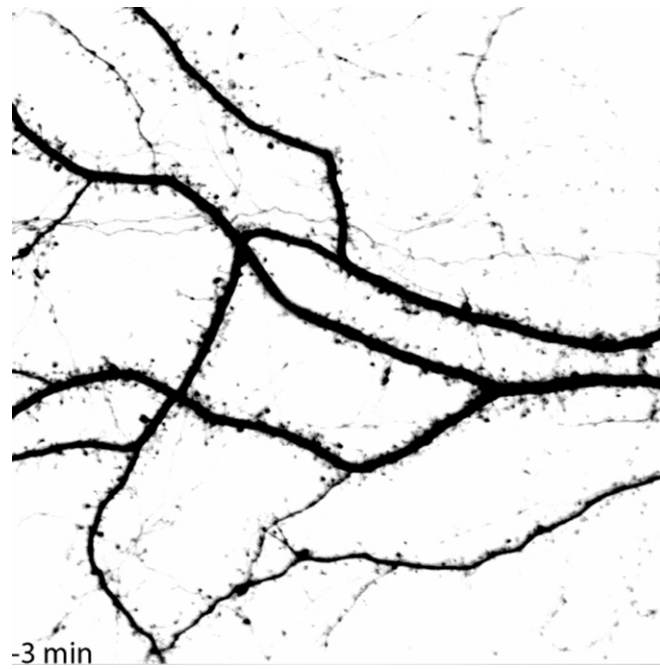

**Movie S1.** Primary cortical neuron culture pretreated with control shRNA was subjected to APV withdrawal treatment to induce the NMDA-R activation, and spine structural change was assessed by time lapse imaging. The majority of the spines were enlarged upon NMDA-R activation.

[Movie S1](#)

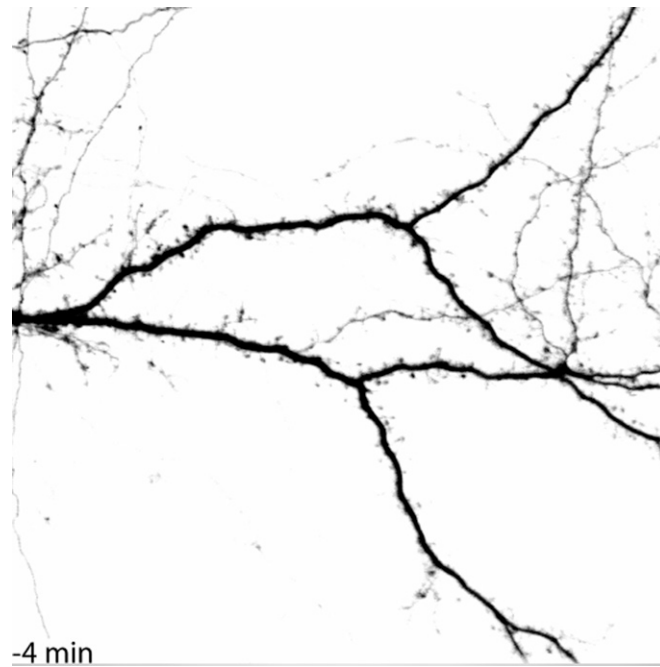

**Movie S2.** The spines in neurons pretreated with DISC1 shRNA displayed gradual shrinkage upon APV withdrawal treatment, which usually triggers the spine enlargement ([Movie S1](#)).

[Movie S2](#)
